# Supplementary material
Source: publisher figshare collection journal article supplement (https://gsapubs.figshare.com/ndownloader/files/23299046)
Supplement: Supplementary file 1 [file 23299046]

**RHENIUM-OSMIUM GEOCHRONOLOGY**

Black carbonaceous shale from outcrop and drill core was sampled from the Callison Lake Formation, Mwashya subgroup (devoid of sulphide mineralization or evidence of fluid flow and from drill core), Taishir and Sheepbed formations. For outcrop samples a ca. 25 cm trench was dug to avoid sampling weathering material similar to methods in Strauss et al. (2014) and to maximize the spread of  $^{187}\text{Re}/^{188}\text{Os}$  values e.g., Kendall et al. (2009). Drill core samples (Zambia) were cut over an interval of 6.49 m and each sample from outcrop and drill core was greater than 30 g yet thinner than 7 cm vertically to minimize variations in initial  $^{187}\text{Os}/^{188}\text{Os}$  values. Although we sampled > 6 m vertically, all initial  $^{187}\text{Os}/^{188}\text{Os}$  values for the Mwashya subgroup displayed very little variation (Table DR1).

Any weathered surfaces were removed with a diamond-encrusted rock saw and samples were then hand-polished using a diamond-encrusted polishing pad to remove cutting marks and eliminate any potential for contamination from the saw blade. The samples were dried overnight at ~60 °C and then crushed to a fine (~30 µm) powder in a SPEX 8500 Shatterbox using a zirconium grinding container and puck in order to homogenize any Re and Os heterogeneity present in the samples (Kendall et al., 2009). Re and Os isotopic abundances and compositions were determined at the Department of Earth and Atmospheric Sciences, University of Houston following methodology by Selby and Creaser (2003) and Cumming et al., (2013).

Between 0.25 and 1 g of sample was digested and equilibrated in 8 ml of  $\text{Cr}^{\text{VI}}\text{O}_3$ - $\text{H}_2\text{SO}_4$  together with a mixed tracer (spike) solution of  $^{190}\text{Os}$  and  $^{185}\text{Re}$  in carius tubes at

220 °C for 48 hours. Rhenium and osmium was isolated and purified using solvent extraction (NaOH, (CH<sub>3</sub>)<sub>2</sub>CO, and CHCl<sub>3</sub>), micro-distillation, anion column chromatography methods, and negative mass spectrometry as outlined by Selby and Creaser (2003) and Cumming et al. (2013). The Cr<sup>VI</sup>O<sub>3</sub>-H<sub>2</sub>SO<sub>4</sub> digestion method was employed as it has been shown to preferentially liberate hydrogenous Re and Os yielding more accurate and precise age determinations (Selby and Creaser, 2003; Kendall et al., 2004; Rooney et al., 2011). Total procedural blanks during this study were  $22.1 \pm 4.2$  pg and  $0.46 \pm 0.05$  pg for Re and Os respectively, with an average <sup>187</sup>Os/<sup>188</sup>Os value of  $0.183 \pm 0.06$  ( $1\sigma$ ,  $n = 4$ ).

Isotopic measurements were performed using a ThermoElectron TRITON PLUS mass spectrometer at the University of Houston via static Faraday collection for Re and ion-counting using a secondary electron multiplier in peak-hopping mode for Os. In-house Re and Os solutions were continuously analyzed during the course of this study to ensure and monitor long-term mass spectrometer reproducibility. The University of Houston Re standard solution measured on faraday cups yields an average <sup>185</sup>Re/<sup>187</sup>Re value of  $0.59827 \pm 0.00158$  ( $1\sigma$ ,  $n = 19$ ), which is indistinguishable, within uncertainty to that of Rooney et al. (2010). The measured difference in <sup>185</sup>Re/<sup>187</sup>Re values for the Re solution and the accepted <sup>185</sup>Re/<sup>187</sup>Re value (0.5974) (Gramlich et al., 1973) is used to correct the Re sample data for instrument mass fractionation and blank and spike contributions. The Os isotope reference material used at NCIET is the Durham Romil Osmium Solution (DROsS) yields an <sup>187</sup>Os/<sup>188</sup>Os ratio of  $0.10694 \pm 0.00051$  ( $1\sigma$ ,  $n = 18$ ) that is indistinguishable, within uncertainty, to those reported in (Rooney et al., 2010).

Uncertainties for <sup>187</sup>Re/<sup>188</sup>Os and <sup>187</sup>Os/<sup>188</sup>Os are determined by error propagation

of uncertainties in Re and Os mass spectrometry measurements, blank abundances and isotopic compositions, spike calibrations, and reproducibility of standard Re and Os isotopic values. The Re-Os isotopic data,  $2\sigma$  calculated uncertainties for  $^{187}\text{Re}/^{188}\text{Os}$  and  $^{187}\text{Os}/^{188}\text{Os}$ , and the associated error correlation function ( $\rho$ ) are regressed to yield a Re-Os date using *Isoplot V. 4.15* with the  $\lambda$   $^{187}\text{Re}$  constant of  $1.666 \times 10^{-11} \text{a}^{-1}$  (Ludwig, 1980; Smoliar et al., 1996; Ludwig, 2011).

## REFERENCES CITED

- Cumming, V.M., Poulton, S.W., Rooney, A.D., and Selby, D., 2013, Anoxia in the terrestrial environment during the late Mesoproterozoic: *Geology*, v. 41, p.583-586.
- Gramlich, J. W., Murphy, T. J., Garner, E. L., and Shields, W. R., 1973, Absolute isotopic abundance ratio and atomic weight of a reference sample of rhenium: *Journal of research of the National Bureau of Standards*, v. 77A, p. 691-698.
- Kendall, B., Creaser, R. A., and Selby, D., 2009,  $^{187}\text{Re}$ - $^{187}\text{Os}$  geochronology of Precambrian organic-rich sedimentary rocks: Geological Society, London, Special Publications, v. 326, no. 1, p. 85-107.
- Ludwig, K. R., 1980, Calculation of uncertainties of U-Pb isotope data: *Earth and Planetary Science Letters*, v. 46, p. 212-220.
- Ludwig, K.R., 2011, *Isoplot/Ex*, Version 4.15: A geochronological toolkit for Microsoft Excel: Geochronology Center Berkeley, v. 4, p.1-70.
- [http://www.bgc.org/isoplot\\_etc/isoplot.html](http://www.bgc.org/isoplot_etc/isoplot.html).
- Rooney, A. D., Selby, D., Houzay, J.-P., and Renne, P. R., 2010, Re-Os geochronology

- of a Mesoproterozoic sedimentary succession, Taoudeni basin, Mauritania:  
Implications for basin-wide correlations and Re-Os organic-rich sediments  
systematics: *Earth and Planetary Science Letters*, v. 289, no. 3-4, p. 486-496.
- Rooney, A.D., Chew, D.M., Selby, D., 2011, Re-Os geochronology of the  
Neoproterozoic-Cambrian Dalradian Supergroup of Scotland and Ireland:  
Implications for Neoproterozoic stratigraphy, glaciation and Re-Os systematics:  
*Precambrian Research*, v. 185, p. 202-214.
- Selby, D., and Creaser, R. A., 2003, Re-Os geochronology of organic rich sediments: an  
evaluation of organic matter analysis methods: *Chemical Geology*, v. 200, no. 3-4,  
p. 225-240.
- Smoliar, M.I., Walker, R.J., Morgan, J.W., 1996, Re-Os ages of Group IIA, IIIA, IVA  
and IVB iron meteorites: *Science*, v. 271, p. 1099-1102.
- Strauss, J.V., Rooney, A.D., Macdonald, F.A., Brandon, A.D., and Knoll, A.H., 2014,  
740 Ma vase-shaped microfossils from Yukon, Canada: Implications for  
Neoproterozoic chronology and biostratigraphy: *Geology*, v.42, p.659-662.

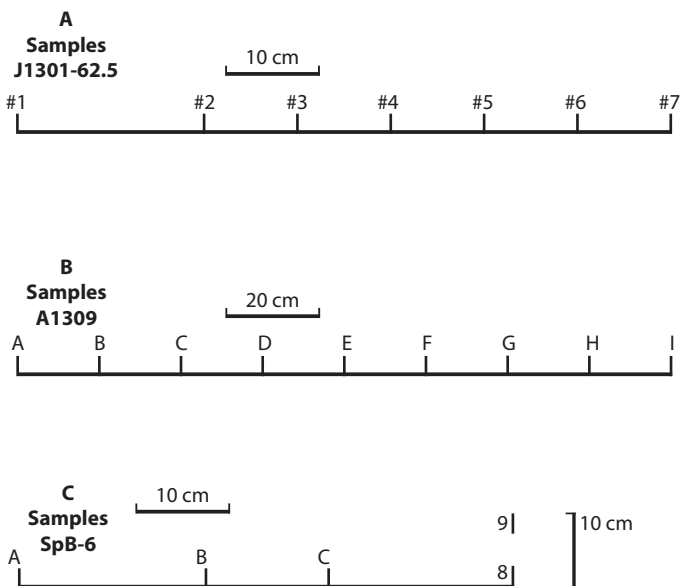

Figure DR1: Schematic diagram of sampling procedures for: A) Callison Lake Formation, sample J1301-62.5 #3 was lost when the carius tube neck broke in the oven and #5 was not processed beyond sample powdering due to time constraints; B) Taishir Formation, samples “G” and “H” were more fissile and broke apart during transport out of the field site and; C) Sheepbed Formation, samples SpB-6 #8 and #9 were part of a vertical transect (height of ca. 1 m) for Os isotope stratigraphy that has not been fully processed yet.

Table DR1: Re and Os elemental abundance data and isotope composition data for all samples Fig. 2A-D

| Isochron                | Sample            | Re (ng/g)     | ±       | Os (pg/g) | ±      | <sup>192</sup> Os | ±      | <sup>187</sup> Re/ <sup>188</sup> Os | ±      | <sup>187</sup> Os/ <sup>188</sup> Os | ±     | rho <sup>a</sup> | Os <sub>i</sub> <sup>b</sup> |       |       |
|-------------------------|-------------------|---------------|---------|-----------|--------|-------------------|--------|--------------------------------------|--------|--------------------------------------|-------|------------------|------------------------------|-------|-------|
| Callison Lake Formation | J1301-62.5-1      | 11.911        | 0.110   | 411.01    | 1.60   | 127.34            | 0.53   | 186.10                               | 2.17   | 2.677                                | 0.028 | 0.702            | 0.331                        |       |       |
|                         | GPS co-ordinates: | J1301-62.5-2  | 17.933  | 419.32    | 1.85   | 111.35            | 0.50   | 320.44                               | 3.18   | 4.381                                | 0.045 | 0.789            | 0.341                        |       |       |
|                         | N64 39'48.0"      | J1301-62.5-4  | 15.263  | 311.05    | 1.66   | 76.36             | 0.48   | 397.68                               | 3.00   | 5.355                                | 0.039 | 0.872            | 0.341                        |       |       |
|                         | W139 43'48.6"     | J1301-62.5-6  | 19.278  | 430.67    | 2.24   | 111.56            | 0.61   | 343.83                               | 3.91   | 4.681                                | 0.040 | 0.775            | 0.346                        |       |       |
|                         |                   | J1301-62.5-7  | 22.191  | 0.130     | 400.75 | 2.01              | 90.41  | 0.48                                 | 488.34 | 3.00                                 | 6.491 | 0.031            | 0.877                        | 0.335 |       |
| Mwashya subgroup        | MJ-31             | 3.296         | 0.037   | 54.61     | 0.43   | 11.77             | 0.14   | 557.18                               | 4.66   | 7.148                                | 0.069 | 0.910            | 0.368                        |       |       |
|                         | GPS co-ordinates: | MJ-32         | 8.273   | 0.080     | 249.33 | 1.27              | 74.63  | 0.48                                 | 220.54 | 2.46                                 | 3.036 | 0.046            | 0.957                        | 0.348 |       |
|                         | Chambishi basin   | ~ MJ-33       | 11.599  | 0.053     | 240.02 | 1.21              | 60.57  | 0.38                                 | 381.02 | 5.00                                 | 5.004 | 0.063            | 0.925                        | 0.361 |       |
|                         |                   | N12 15'00.0"  | MJ-34   | 14.027    | 0.067  | 255.91            | 1.33   | 59.60                                | 0.37   | 468.24                               | 6.17  | 6.052            | 0.076                        | 0.925 | 0.346 |
|                         |                   | E28 20'00.0"  | MJ-35   | 11.926    | 0.171  | 387.54            | 1.91   | 118.56                               | 0.65   | 200.15                               | 2.14  | 2.808            | 0.043                        | 0.749 | 0.369 |
|                         |                   |               | MJ-36   | 7.947     | 0.126  | 174.65            | 1.07   | 45.57                                | 0.33   | 347.00                               | 5.38  | 4.593            | 0.081                        | 0.739 | 0.365 |
|                         |                   |               | MJ-37   | 0.826     | 0.072  | 37.76             | 0.47   | 12.62                                | 0.32   | 130.27                               | 6.13  | 1.931            | 0.036                        | 0.800 | 0.343 |
| Taishir Formation       | A1309-A           | 0.928         | 0.005   | 55.26     | 0.20   | 18.97             | 0.08   | 97.34                                | 1.09   | 1.680                                | 0.013 | 0.863            | 0.600                        |       |       |
|                         | GPS co-ordinates: | A1309-B       | 1.885   | 0.008     | 95.70  | 0.36              | 32.12  | 0.13                                 | 116.77 | 1.22                                 | 1.891 | 0.014            | 0.969                        | 0.596 |       |
|                         | N46 40'20.1"      | A1309-C       | 1.042   | 0.004     | 60.30  | 0.22              | 20.63  | 0.09                                 | 100.45 | 1.12                                 | 1.712 | 0.015            | 0.964                        | 0.598 |       |
|                         | E96 33'39.5"      | A1309-D       | 9.644   | 0.048     | 328.34 | 1.36              | 101.62 | 0.41                                 | 188.82 | 1.99                                 | 2.688 | 0.025            | 0.885                        | 0.594 |       |
|                         |                   | A1309-E       | 3.720   | 0.015     | 164.98 | 0.65              | 54.06  | 0.22                                 | 136.92 | 1.44                                 | 2.121 | 0.022            | 0.942                        | 0.602 |       |
|                         |                   | A1309-I       | 5.718   | 0.024     | 153.99 | 0.69              | 44.44  | 0.18                                 | 256.00 | 2.69                                 | 3.428 | 0.037            | 0.968                        | 0.589 |       |
| Sheepbed Formation      | GPS               | SpB-6A        | 14.85   | 0.074     | 316.77 | 1.92              | 78.94  | 0.34                                 | 374.38 | 3.80                                 | 5.163 | 0.050            | 0.845                        | 1.213 |       |
|                         | co-ordinates:     | N64           | SpB-6B  | 5.45      | 0.028  | 371.99            | 0.99   | 121.46                               | 0.23   | 89.29                                | 0.91  | 2.155            | 0.050                        | 0.923 | 1.213 |
|                         |                   | 29'50.4"      | SpB-6C  | 6.15      | 0.089  | 106.96            | 0.53   | 23.89                                | 0.11   | 512.09                               | 5.64  | 6.635            | 0.060                        | 0.966 | 1.232 |
|                         |                   | W129 25'42.0" | SpB-6-8 | 12.21     | 0.076  | 204.59            | 0.90   | 44.72                                | 0.14   | 543.29                               | 6.00  | 6.943            | 0.070                        | 0.829 | 1.210 |
|                         |                   |               | SpB-6-9 | 12.08     | 0.150  | 276.39            | 2.24   | 70.86                                | 0.66   | 339.17                               | 5.68  | 4.808            | 0.017                        | 0.784 | 1.218 |

Uncertainties are given as 2σ for <sup>187</sup>Re/<sup>188</sup>Os and <sup>187</sup>Os/<sup>188</sup>Os and <sup>192</sup>Os.

The uncertainty includes the 2 SE uncertainty for mass spectrometer analysis plus uncertainties for Os blank abundance and isotopic composition.

Ages are calculated using the λ<sup>187</sup>Re = 1.666 x 10<sup>-11</sup> y<sup>-1</sup> (Smoliar et al., 1996).

<sup>a</sup> Rho is the associated error correlation (Ludwig, 1980).

<sup>b</sup> Os<sub>i</sub> = initial <sup>187</sup>Os/<sup>188</sup>Os isotope ratio calculated at 753 Ma, 727 Ma, 659 Ma and 632 Ma for the Callison Lake Formation, Mwashya subgroup and Taishir and Sheepbed formations, respectively.

All GPS coordinates are in datum WGS 84

Table DR2: Geological age constraints, techniques and data sources

| Paleocontinent | Age (Ma) | (+)  | (-)  | Technique     | Grains   | Relationship to Glacial Deposit | Number | Reference                                                                                            |
|----------------|----------|------|------|---------------|----------|---------------------------------|--------|------------------------------------------------------------------------------------------------------|
| South China    | 632.5    | 0.5  | 0.5  | U-Pb ID-TIMS  | magmatic | above Nantuo                    | 1      | Condon et al., 2005, Science, v. <b>308</b> , p. 95-98                                               |
| South China    | 632.5    | 1.0  | 1.0  | U-Pb ID-TIMS  | magmatic | above Nantuo                    | 2      | Schmitz, M.D., Geological Time Scale 2012, v. <b>2</b> , p. 1045-1082 - recalculation of above date  |
| Laurentia      | 632.3    | 5.9  | 5.9  | Re-Os         | isochron | above Ice Brook                 | 3      | This paper                                                                                           |
| Kalahari       | 635.5    | 0.5  | 0.5  | U-Pb ID-TIMS  | magmatic | within Ghuab                    | 4      | Hoffmann et al., 2004, Geology, v. <b>32</b> , p. 817-820                                            |
| Kalahari       | 635.5    | 1.1  | 1.1  | U-Pb ID-TIMS  | magmatic | within Ghuab                    | 2      | Schmitz, M.D., Geological Time Scale 2012, v. <b>2</b> , p. 1045-1082 - recalculation of above date  |
| South China    | 636.3    | 4.9  | 4.9  | U-Pb SHRIMP   | magmatic | within Nantuo                   | 5      | Zhang et al., 2005, Geology, v. <b>33</b> , p. 473-476                                               |
| Australia      | 636.4    | 0.5  | 0.5  | U-Pb ID-TIMS  | magmatic | above Cottons Breccia           | 6      | Calver et al., 2013, Geology, v. <b>41</b> , p. 1127-1130                                            |
| Australia      | 640.7    | 5.7  | 5.7  | Re-Os         | isochron | possibly above Sturtian         | 7      | Kendall et al., 2009, Precambrian Research, v. <b>172</b> , p. 301-310                               |
| South China    | 654.5    | 3.8  | 3.8  | U-Pb SHRIMP   | magmatic | below Nantuo                    | 5      | Zhang et al., 2005, Geology, v. <b>33</b> , p. 473-476                                               |
| Australia      | 657.2    | 6.9  | 6.9  | Re-Os         | isochron | above Sturtian below Marinoan   | 8      | Kendall et al., 2006, Geology, v. <b>34</b> , p. 729-732                                             |
| Mongolia       | 659.0    | 4.5  | 4.5  | Re-Os         | isochron | 1m above Maikhan Ul             | 3      | This paper                                                                                           |
| Laurentia      | 659.6    | 10.2 | 10.2 | Re-Os         | isochron | below Port Askaig               | 9      | Rooney et al., 2011, Precambrian Research, v. <b>185</b> , p. 202-214                                |
| Laurentia      | 662.4    | 4.6  | 4.6  | Re-Os         | isochron | above Rapitan                   | 10     | Rooney et al., 2014, Proceedings of the National Academy of Sciences, v. <b>110</b> , p. 51-56.      |
| South China    | 662.9    | 4.3  | 4.3  | U-Pb ID-TIMS  | magmatic | below Nantuo above Tiesiao      | 11     | Zhou et al., 2004, Geology, v. <b>32</b> , p. 437-440.                                               |
| Laurentia      | 684.0    | 4.0  | 4.0  | U-Pb SHRIMP   | magmatic | unknown                         | 12     | Lund et al., 2003, Geological Society of America Bulletin, v. <b>115</b> , p. 349-372                |
| Laurentia      | 685.0    | 7.0  | 7.0  | U-Pb SHRIMP   | magmatic | unknown                         | 12     | Lund et al., 2003, Geological Society of America Bulletin, v. <b>115</b> , p. 349-372                |
| Laurentia      | 685.5    | 0.4  | 0.4  | U-Pb ID-TIMS  | magmatic | within lower Scout Mountain     | 13     | Keeley et al., 2013, Lithosphere, v. <b>5</b> , p. 128-150                                           |
| Laurentia      | 687.4    | 1.3  | 1.3  | U-Pb ID-TIMS  | magmatic | unknown                         | 14     | Condon and Bowring, 2011, Geological Society, London, Memoirs, Chapter v. <b>36</b> , p. 135-149     |
| Laurentia      | 688.6    | 9.5  | 6.2  | U-Pb ID-TIMS  | magmatic | within Rapitan                  | 15     | Ferri et al., 1999, British Columbia Ministry of Energy and Mines, Bulletin, v. <b>107</b> , p.1-122 |
| Laurentia      | 709.0    | 5.0  | 5.0  | U-Pb SHRIMP   | magmatic | unknown                         | 16     | Fanning and Link, 2004, Geology, v. <b>32</b> , p. 881-884                                           |
| Arabia         | 711.5    | 0.3  | 0.3  | U-Pb ID-TIMS  | magmatic | within Ghubrah                  | 17     | Bowring et al., 2007, American Journal of Science, v. <b>307</b> , p. 1097-1145                      |
| South China    | 715.8    | 2.5  | 2.5  | U-Pb ID-TIMS  | magmatic | below Chang'an                  | 18     | Lan et al., 2014, Precambrian Research, v. <b>255</b> , p. 401-411                                   |
| Laurentia      | 716.5    | 0.2  | 0.2  | U-Pb ID-TIMS  | magmatic | within Rapitan                  | 19     | Macdonald et al., 2010, Science, v. <b>327</b> , p. 1241-1243                                        |
| Laurentia      | 717.4    | 0.1  | 0.1  | U-Pb ID-TIMS  | magmatic | below Rapitan                   | 19     | Macdonald et al., 2010, Science, v. <b>327</b> , p. 1241-1243                                        |
| Laurentia      | 719.5    | 0.3  | 0.3  | U-Pb ID-TIMS  | magmatic | base of Hula Hula               | 20     | Cox et al., in review, Lithosphere                                                                   |
| Arabia         | 726.0    | 1.0  | 1.0  | U-Pb ID-TIMS  | magmatic | Leger granite                   | 17     | Bowring et al., 2007, American Journal of Science, v. <b>307</b> , p. 1097-1145                      |
| Congo          | 727.3    | 4.9  | 4.9  | Re-Os         | isochron | below Grand Conglomerate        | 3      | This paper                                                                                           |
| Laurentia      | 732.2    | 4.7  | 4.7  | Re-Os         | isochron | below Rapitan                   | 10     | Rooney et al., 2014, Proceedings of the National Academy of Sciences, v. <b>110</b> , p. 51-56.      |
| Congo          | 735.0    | 5.0  | 5.0  | U-Pb SHRIMP   | magmatic | below Kundelungu                | 21     | Key et al., 2001, Journal of African Earth Sciences, v. <b>33</b> , p. 503-528                       |
| Laurentia      | 736.0    | 23.0 | 17.0 | U-Pb ID-TIMS  | magmatic | below Rapitan                   | 22     | McDonough and Parrish, 1991, Canadian Journal of Earth Sciences, v. <b>28</b> , p. 1202-1216         |
| Laurentia      | 739.9    | 6.5  | 6.5  | Re-Os         | isochron | below Rapitan                   | 23     | Strauss et al., 2014, Geology, v. <b>42</b> , p. 659-662                                             |
| Kalahari       | 741.0    | 6.0  | 6.0  | Pb-Pb ID-TIMS | magmatic | below Numees                    | 24     | Frimmel et al. 1996, The Journal of Geology, v. <b>104</b> , p. 459-469                              |
| Laurentia      | 742.0    | 6.0  | 6.0  | U-Pb ID-TIMS  | magmatic | top of Chuar                    | 25     | Karlstrom et al., 2000, Geology, v. <b>28</b> , p. 619-622                                           |
| Laurentia      | 752.7    | 5.5  | 5.5  | Re-Os         | isochron | below Rapitan                   | 3      | This paper                                                                                           |

All age uncertainties are  $2\sigma$ .

ID-TIMS, Isotope-Dilution Thermal Ionization Mass Spectrometry

SHRIMP, Sensitive High Resolution Ion Microprobe

SIMS, Secondary Ion Mass Spectrometry
